# Supplementary material for: In the first proven SN2′ fullerene reaction, both C3 and C1 C60F36 hydrolyse to C1 isomers of C60F35OH that eliminate HF to give epoxides C60F34O; C60F36O oxides are shown to be ethers, and a fourth isomer of C60F36 existsElectronic supplementary information (ESI) available: IR spectra of 1, 2, and C60F36O; EI and 19F NMR spectra of mixture eluting at 15 min (heptane). See http://www.rsc.org/suppdata/ob/b2/b209760p/
Source: Royal Society of Chemistry journal article supplement (doi:10.1039/b209760p), 2003-02-24
Supplement: figures.doc [file figures.doc]

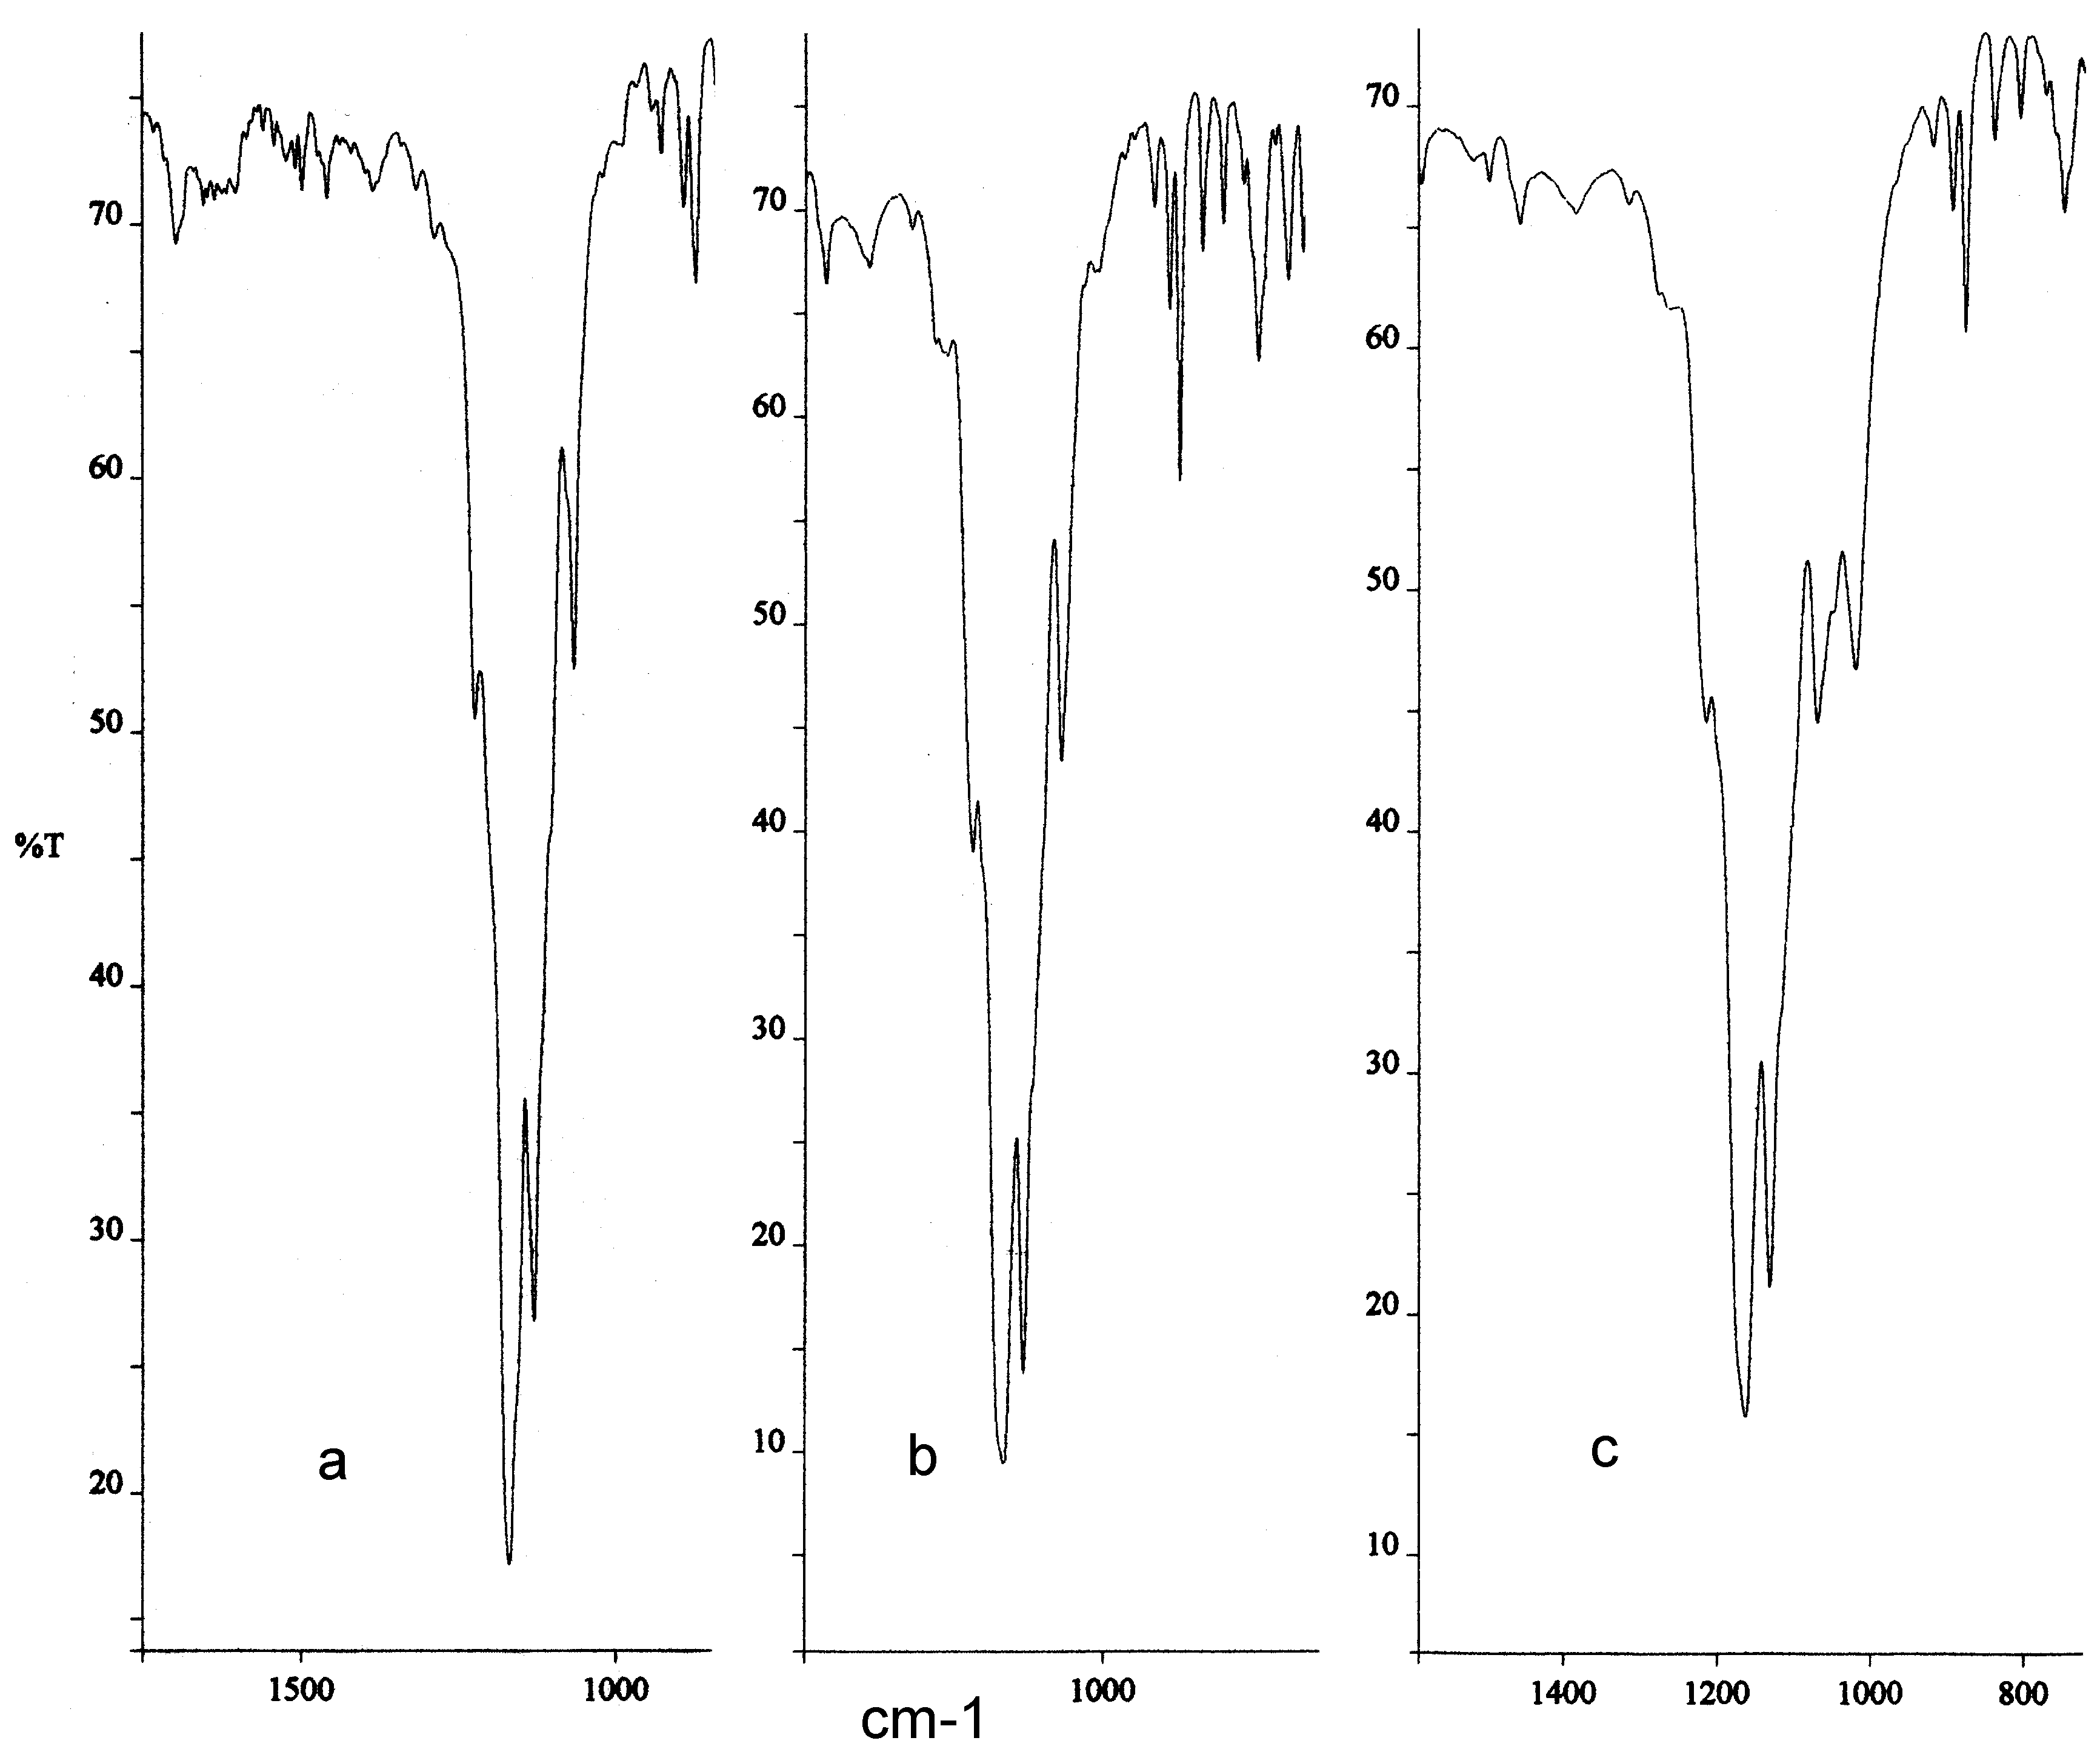


**Figs. S1a,b,c** IR spectra (KBr) for C60F35OH isomers **1**, **2**, and C60F36O, respectively


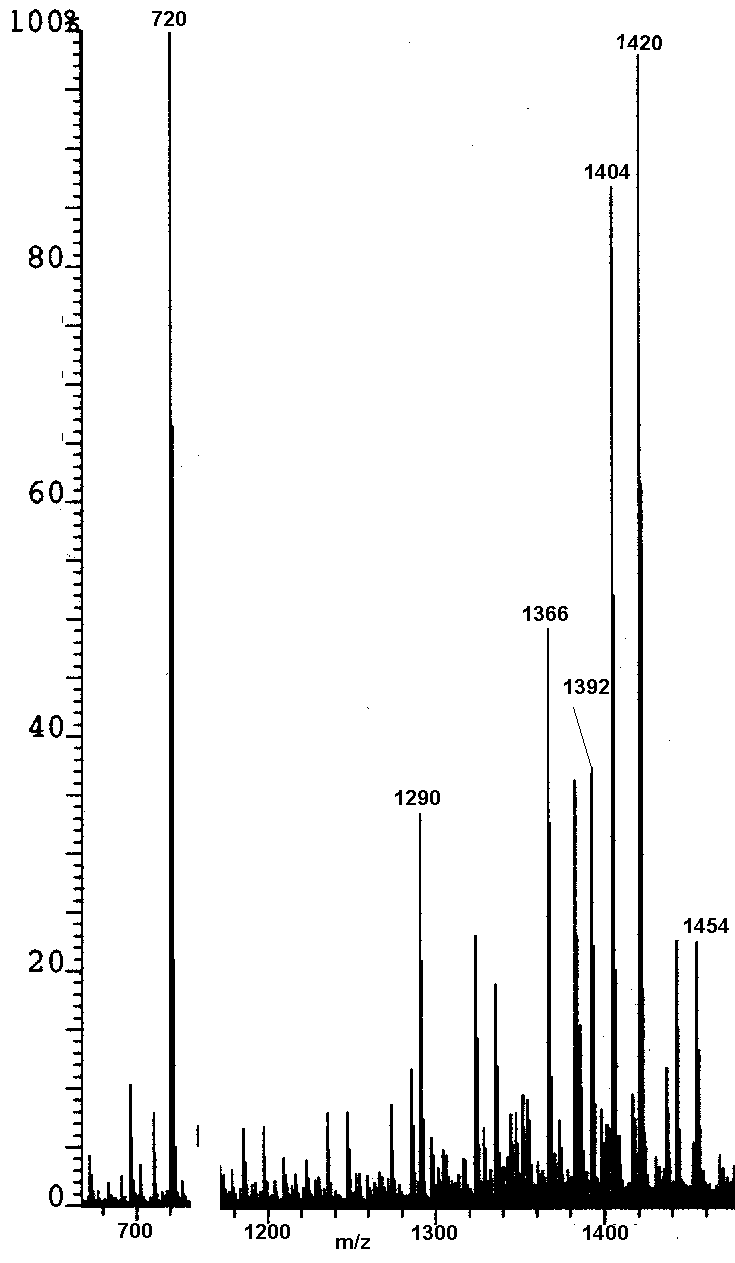


**Fig. S2** EI mass spectrum of the sample mixture eluting at 15 min (heptane)


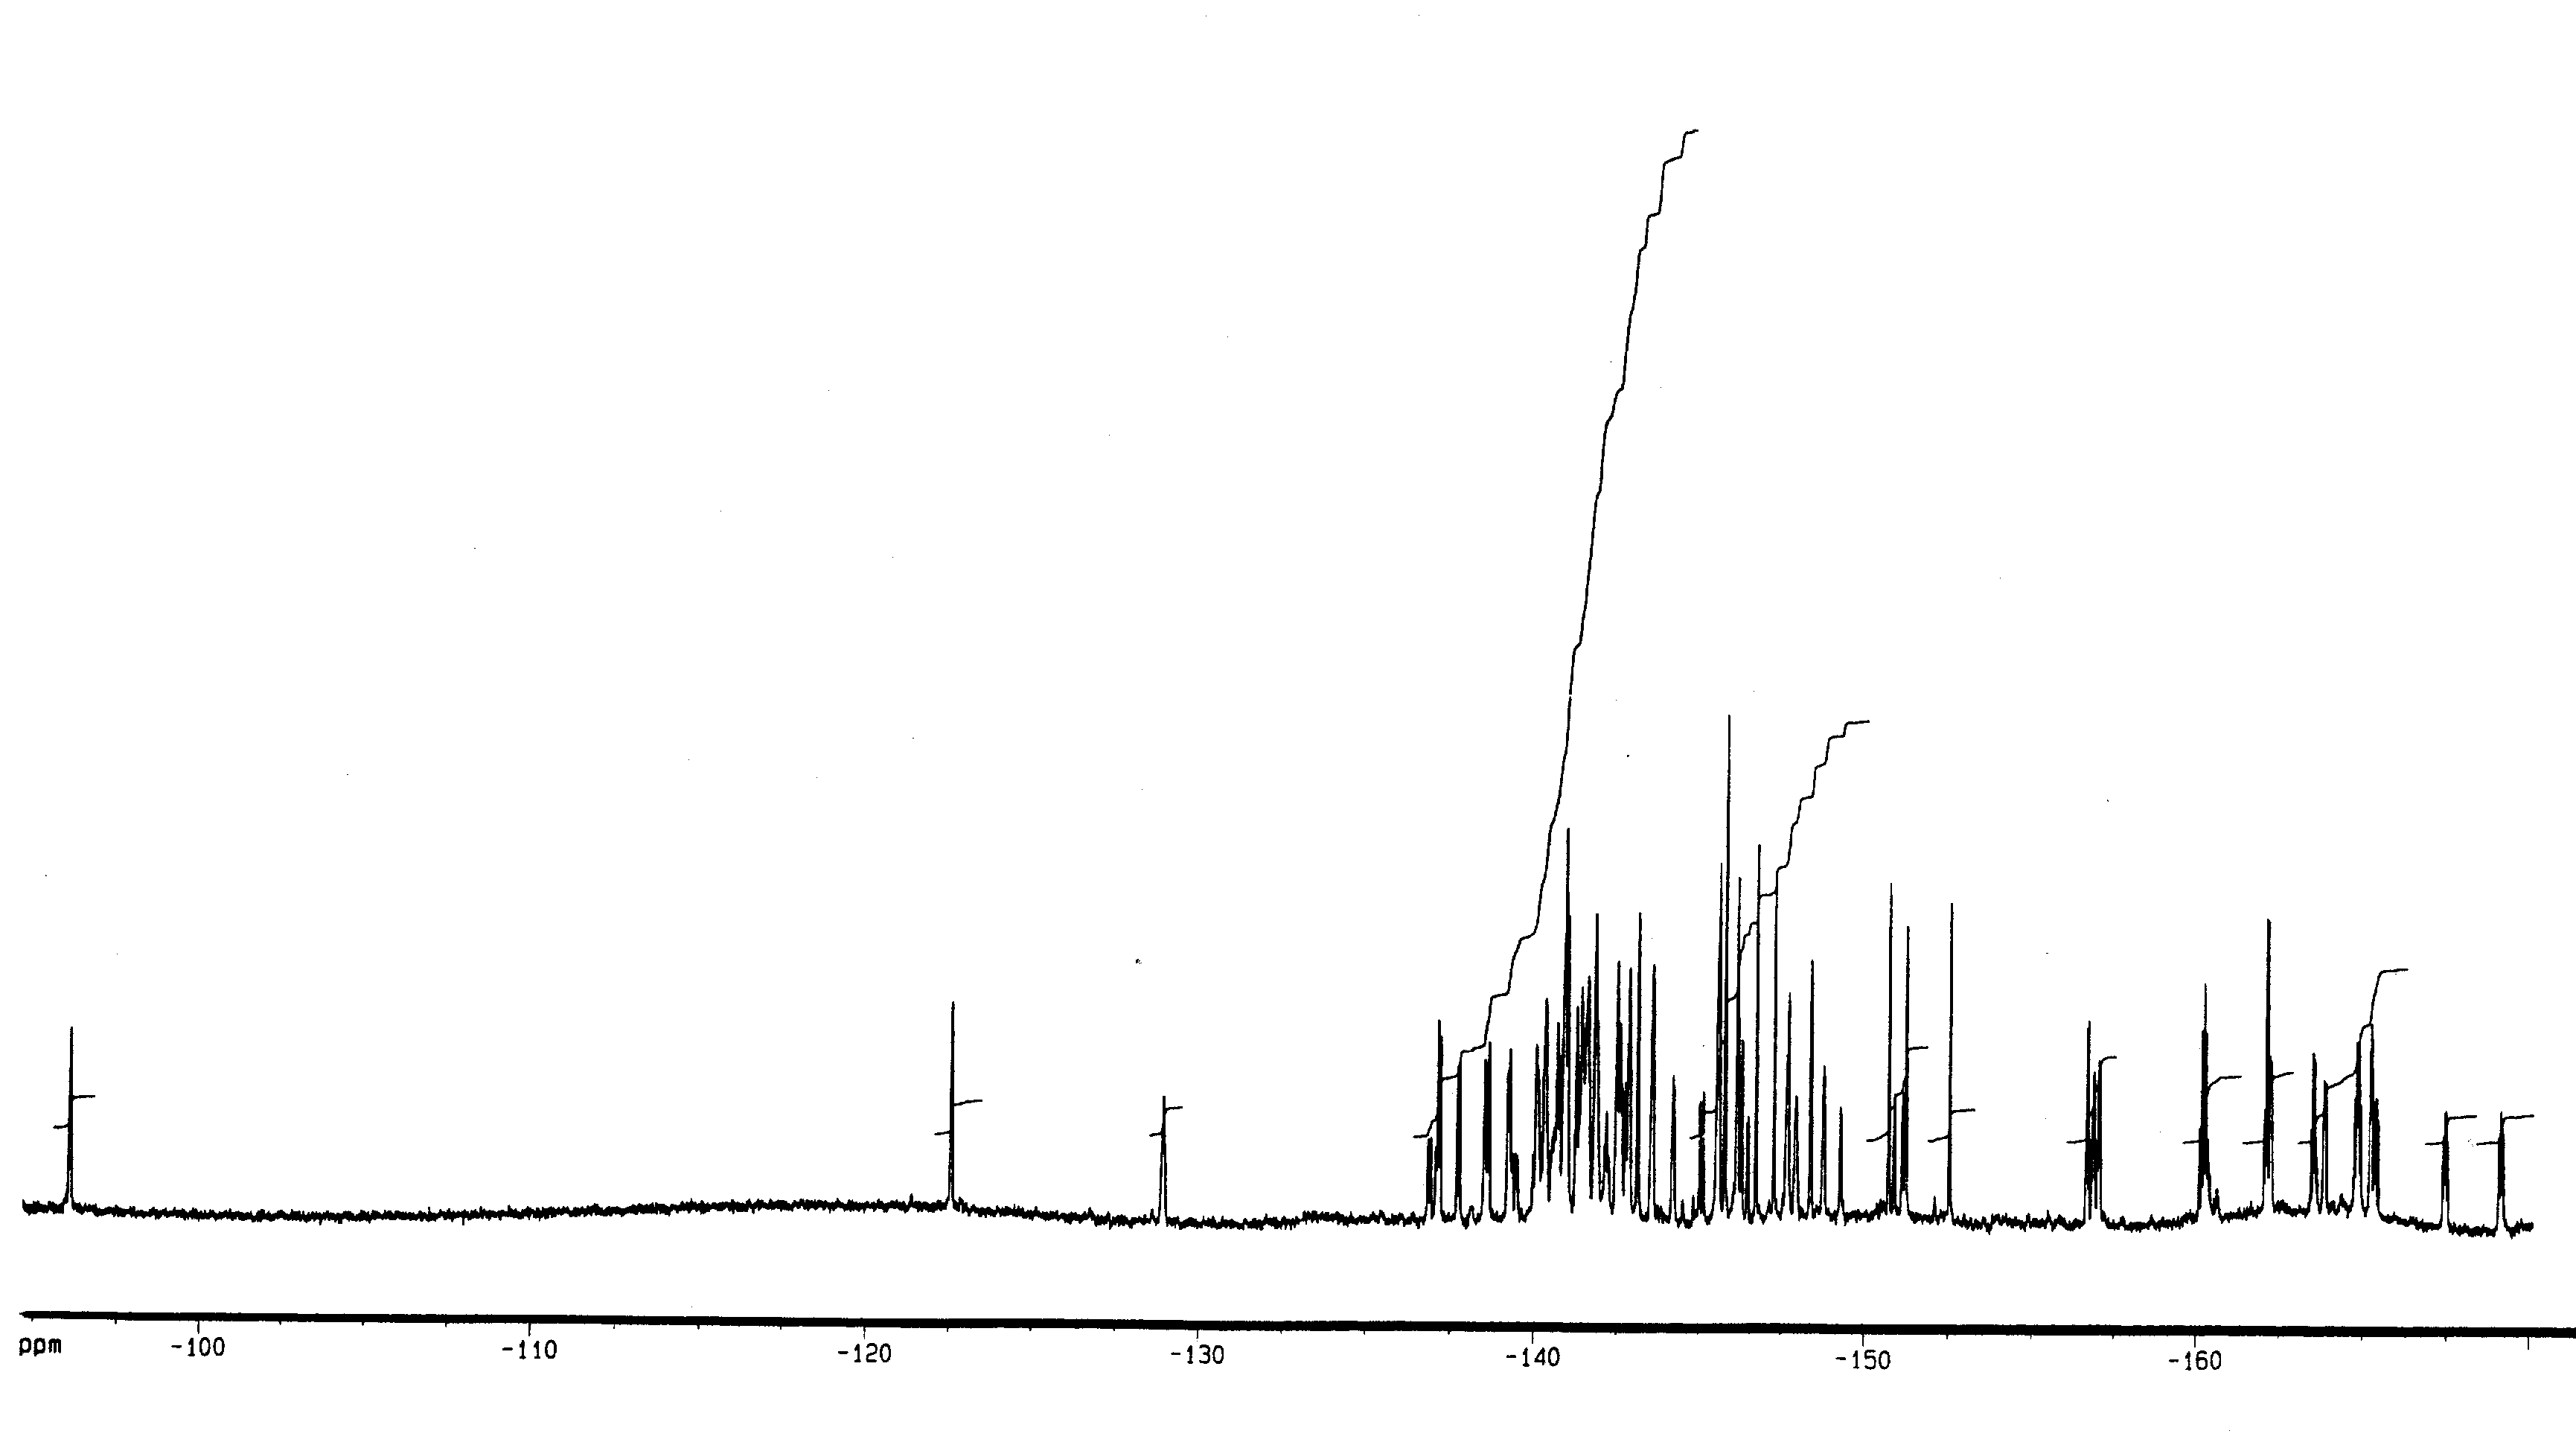


**Fig. S3** 19F NMR spectrum of the sample mixture eluting at 15 min (heptane)
